# Supplementary material
Source: PubMed Central journal article supplement (PMC8517278)
Supplement: mmc1.pdf [file mmc1.pdf]

**Table S1. Characteristics of children with acute COVID-19 across their clinical spectrum.**

|                                               | Acute                 |                |                    |                | P                                      |
|-----------------------------------------------|-----------------------|----------------|--------------------|----------------|----------------------------------------|
|                                               | Asymptomatic<br>n= 84 | Mild<br>n= 358 | Moderate<br>n= 100 | Severe<br>n= 8 |                                        |
| Age, years, median (range)                    | 6.0 (0.6-13.0)        | 2.0 (0.6-9.2)  | 5.0 (1.4-10.0)     | 1.0 (0.3-3.6)  |                                        |
| <1 y, n (%)                                   | 29 (35)               | 135 (38)       | 18 (18)            | 4 (50)         | * Mild vs Mod                          |
| 1-5 y, n (%)                                  | 13 (15)               | 91 (25)        | 39 (39)            | 3 (38)         | *Asy, Mild vs Mod                      |
| 6-10 y, n (%)                                 | 14 (17)               | 45 (13)        | 17 (17)            | 0              |                                        |
| >10 y, n (%)                                  | 28 (33)               | 87 (24)        | 26 (26)            | 1 (12)         |                                        |
| Sex, n (%)                                    |                       |                |                    |                |                                        |
| Female                                        | 43 (51)               | 171 (48)       | 47 (47)            | 6 (75)         |                                        |
| Male                                          | 41 (49)               | 187 (52)       | 53 (53)            | 2 (25)         |                                        |
| Days after symptom onset (range) <sup>a</sup> | N/A                   | 1 (1-3)        | 2 (1-3)            | 1 (1-2)        | * Asy vs Mild, Mod                     |
| SARS-CoV-2 IgG positive, n (%) <sup>b</sup>   | 31 (37)               | 82 (23)        | 26 (26)            | 0              | **Asy vs Mild, Sev                     |
| SARS-CoV-2 IgM positive, n (%) <sup>b</sup>   | 38 (45)               | 115 (32)       | 38 (38)            | 0              | *Asy vs Mild, Sev;<br>*Mod vs Sev      |
| Comorbidities, n (%)                          |                       |                |                    |                |                                        |
| None                                          | 70 (83)               | 327 (91)       | 44 (44)            | 1 (12.5)       | *Asy, Mild vs Mod, Sev                 |
| Skin disease                                  | 0                     | 1 (0.3)        | 1 (1)              | 1 (12.5)       | * Asy, Mild, Mod vs Sev                |
| Heart disease                                 | 0                     | 1 (0.3)        | 6 (6)              | 2 (25)         | * Asy, Mild vs Mod, Sev; * Mod vs Sev  |
| Renal disease                                 | 3 (3.6)               | 1 (0.3)        | 4 (4)              | 1 (12.5)       | *Asy, Mod, Sev vs Mild                 |
| Lung disease                                  | 3 (3.6)               | 13 (3.6)       | 24 (24)            | 3 (38)         | **Asy, Mild vs Mod, Sev                |
| Prematurity                                   | 1 (1.2)               | 3 (0.8)        | 6 (6)              | 1 (12.5)       | * Mild vs Mod, Sev                     |
| Autoimmunity                                  | 4 (4.8)               | 0              | 2 (2)              | 2 (25)         | * Asy, Mod vs Mild, Sev; * Mild vs Sev |
| Cancer                                        | 2 (2.3)               | 1 (0.3)        | 9 (9)              | 2 (25)         | * Asy, Mild vs Mod, Sev                |
| Obesity                                       | 0                     | 12 (3.4)       | 11 (11)            | 0              | * Asy, Mild vs Mod                     |
| Undernutrition                                | 2 (2.3)               | 1 (0.3)        | 6 (6)              | 2 (25)         | * Asy, Mild vs Mod, Sev; * Mod vs Sev  |
| Diabetes                                      | 3 (3.6)               | 3 (0.8)        | 1 (1)              | 0              |                                        |
| Genetic disorder                              | 0                     | 1 (0.3)        | 2 (2)              | 2 (25)         |                                        |
| Coinfections, n (%)                           |                       |                |                    |                | * Mild vs Mod                          |
| None                                          | 82 (97.6)             | 348 (97.2)     | 91 (91)            | 6 (75)         |                                        |
| Bacterial                                     | 2 (2.4)               | 10 (2.8)       | 9 (9)              | 1 (12.5)       |                                        |
| Viral                                         | 0                     | 0              | 0                  | 1 (12.5)       |                                        |
| Pneumonia, n (%)                              | 0                     | 0              | 26 (26)            | 4 (50)         | ** Asy, Mild vs Mod, Sev               |
| PICU admission, n (%)                         | 0                     | 0              | 4 (4)              | 8 (100)        | * Asy, Mild vs Mod, Sev; * Mod vs Sev  |
| Respiratory status, n (%)                     |                       |                |                    |                |                                        |
| Mechanical ventilation                        | 0                     | 0              | 1 (1)              | 3 (38)         | * Asy, Mild, Mod vs Sev                |
| Oxygen requirement                            | 0                     | 0              | 8 (8)              | 5 (62)         | * Asy, Mild vs Mod, Sev; * Mod vs Sev  |
| Room air                                      | 84 (100)              | 358 (100)      | 91 (91)            | 0              |                                        |
| Outcome, n (%)                                |                       |                |                    |                |                                        |
| Discharged                                    | 84 (100)              | 358 (100)      | 69 (69)            | 0              |                                        |

|                       |   |   |         |        |                                           |
|-----------------------|---|---|---------|--------|-------------------------------------------|
| Remained hospitalized | 0 | 0 | 31 (31) | 6 (75) | ** Asy, Mild vs Mod,<br>Sev; * Mod vs Sev |
| Deceased              | 0 | 0 | 0       | 2 (25) | * Asy, Mild, Mod vs Sev                   |

---

Data are expressed as median values (IQR) unless otherwise indicated.  
Abbreviations: PICU, pediatric intensive care unit. <sup>a</sup> at hospital admission. <sup>b</sup> at time  
of blood collection. Only significant p values are shown. \* p<0.05, \*\* p<0.01.

**Table S2. Characteristics of children under convalescence phase of infection.**

|                                               | Convalescent          |               |                   |                | P                                      |
|-----------------------------------------------|-----------------------|---------------|-------------------|----------------|----------------------------------------|
|                                               | Asymptomatic<br>n= 10 | Mild<br>n= 88 | Moderate<br>n= 31 | Severe<br>n= 9 |                                        |
| Age, years, median (range)                    | 13 (0.8-16.2)         | 5.7 (1-11)    | 4 (1.3-14)        | 1.4 (0.3-3.3)  | *Asy vs Sev                            |
| <1 y, n (%)                                   | 2 (20)                | 16 (18)       | 6 (19)            | 4 (45)         |                                        |
| 1-5 y, n (%)                                  | 2 (20)                | 23 (26)       | 11 (36)           | 5 (55)         |                                        |
| 6-10 y, n (%)                                 | 0                     | 18 (21)       | 4 (13)            | 0              |                                        |
| >10 y, n (%)                                  | 6 (60)                | 31 (35)       | 10 (32)           | 0              | *Asy vs Sev                            |
| Sex, n (%)                                    |                       |               |                   |                | *Asy vs Mild, Mod, Sev                 |
| Female                                        | 1 (10)                | 41 (47)       | 19 (61)           | 6 (67)         |                                        |
| Male                                          | 9 (90)                | 47 (53)       | 12 (39)           | 3 (33)         |                                        |
| Days after symptom onset (range) <sup>a</sup> | N/A                   | 31 (21-36)    | 33 (25-39)        | 28 (24-33)     |                                        |
| SARS-CoV-2 IgG positive, n (%) <sup>a</sup>   | 7 (70)                | 59 (66)       | 19 (61)           | 2 (22)         | * Mild vs Sev                          |
| SARS-CoV-2 IgM positive, n (%) <sup>a</sup>   | 6 (60)                | 47 (54)       | 14 (45)           | 3 (33)         |                                        |
| Comorbidities, n (%)                          |                       |               |                   |                |                                        |
| None                                          | 6 (60)                | 77 (88)       | 9 (29)            | 2 (22)         | ** Mild vs Mod, Sev                    |
| Skin disease                                  | 0                     | 0             | 0                 | 0              |                                        |
| Heart disease                                 | 0                     | 0             | 2 (6.5)           | 2 (22)         | * Mild vs Sev                          |
| Renal disease                                 | 1 (10)                | 0             | 2 (6.5)           | 1 (11)         |                                        |
| Lung disease                                  | 1 (10)                | 6 (7)         | 9 (29)            | 3 (33)         | * Mild vs Mod, Sev                     |
| Prematurity                                   | 0                     | 2 (2.3)       | 4 (13)            | 0              |                                        |
| Autoimmunity                                  | 1 (10)                | 0             | 0                 | 1 (11)         | * Asy, Sev vs Mild                     |
| Cancer                                        | 1 (10)                | 0             | 7 (23)            | 1 (11)         | ** Mild vs Asy, Mod, Sev               |
| Obesity                                       | 0                     | 3 (3.4)       | 4 (13)            | 0              |                                        |
| Undernutrition                                | 2 (20)                | 0             | 4 (13)            | 1 (11)         | ** Mild vs Asy, Mod, Sev               |
| Diabetes                                      | 0                     | 1 (1.1)       | 0                 | 1 (11)         |                                        |
| Genetic disorder                              | 1 (10)                | 0             | 0                 | 1 (11)         | * Asy, Sev vs Mild                     |
| Coinfections, n (%)                           |                       |               |                   |                |                                        |
| None                                          | 9 (90)                | 85 (96.6)     | 26 (84)           | 7 (78)         |                                        |
| Bacterial                                     | 1 (10)                | 3 (3.4)       | 5 (16)            | 1 (11)         |                                        |
| Viral                                         | 0                     | 0             | 0                 | 1 (11)         |                                        |
| Pneumonia, n (%)                              | 0                     | 0             | 11 (35)           | 4 (44)         | ** Asy, Mild vs Mod, Sev               |
| PICU admission, n (%)                         | 0                     | 0             | 3 (10)            | 9 (100)        | ** Asy, Mild vs Mod, Sev; * Mod vs Sev |
| Respiratory status, n (%)                     |                       |               |                   |                |                                        |
| Mechanical ventilation                        | 0                     | 0             | 1 (3.2)           | 4 (45)         | *Asy, Mild, Mod vs Sev                 |
| Oxygen requirement                            | 0                     | 2 (2.3)       | 9 (29)            | 5 (55)         | *Asy, Mild vs Sev;<br>*Mild vs Mod     |
| Room air                                      | 10 (100)              | 86 (97.7)     | 21 (68)           | 0              | *Asy, Mild, Mod vs Sev                 |

Data are expressed as median values (IQR) unless otherwise indicated. Abbreviations:  
PICU, pediatric intensive care unit. <sup>a</sup> at time of testing. Only significant p values are shown.  
\* p<0.05, \*\* p<0.01.

**Table S3. Characteristics of severe children with COVID-19.**

|              | Patient         | Age (y) | Sex | SARS-CoV-2 Ab |      | Main Comorbidities                                | Coinfection   | Pneumonia | PICU | <sup>a</sup> Outcome |
|--------------|-----------------|---------|-----|---------------|------|---------------------------------------------------|---------------|-----------|------|----------------------|
|              |                 |         |     | IgG+          | IgM+ |                                                   |               |           |      |                      |
| Acute        | #1              | 15.0    | F   | NR            | NR   | Common variable immunodeficiency-Psoriasis        | No            | Yes       | Yes  | Recovered            |
|              | #2              | 0.3     | M   | NR            | NR   | Acute lymphoblastic leukemia                      | Yes. Bacteria | Yes       | Yes  | Recovered            |
|              | #3              | 0.3     | F   | NR            | NR   | Prematurity-Microcephaly-Undernutrition-Genetic   | No            | No        | Yes  | Recovered            |
|              | #4              | 2.5     | F   | NR            | NR   | Undernutrition-Dermatomyositis-Pulmonary fibrosis | No            | Yes       | Yes  | Deceased             |
|              | #5              | 4.0     | F   | NR            | NR   | Respiratory disease                               | No            | N/D       | Yes  | Recovered            |
|              | #6              | 0.1     | F   | NR            | NR   | Congenital heart disease-Renal failure            | No            | Yes       | Yes  | Deceased             |
|              | #7              | 0.5     | F   | NR            | NR   | Down syndrome- Heart disease-Lung disease         | No            | No        | Yes  | Recovered            |
|              | #8              | 1.4     | M   | NR            | NR   | No                                                | Yes. Virus    | No        | Yes  | Recovered            |
| Convalescent | #2 <sup>b</sup> | 0.3     | M   | R             | R    | Acute lymphoblastic leukemia                      | Yes. Bacteria | Yes       | Yes  | Recovered            |
|              | #4 <sup>b</sup> | 2.5     | F   | NR            | R    | Undernutrition-Dermatomyositis-Pulmonary fibrosis | No            | Yes       | Yes  | Deceased             |
|              | #5 <sup>b</sup> | 0.3     | F   | NR            | NR   | Respiratory disease                               | No            | N/D       | Yes  | Recovered            |
|              | #6 <sup>b</sup> | 0.1     | F   | NR            | NR   | Cardiopathy congenital-Renal failure              | No            | Yes       | Yes  | Deceased             |
|              | #7 <sup>b</sup> | 0.5     | F   | NR            | NR   | Down syndrome- Heart disease-Lung disease         | No            | No        | Yes  | Recovered            |
|              | #8 <sup>b</sup> | 1.4     | M   | NR            | NR   | No                                                | Yes. Virus    | No        | Yes  | Recovered            |
|              | #9              | 4.0     | M   | R             | R    | Diabetes                                          | No            | No        | Yes  | Recovered            |
|              | #10             | 1.5     | F   | NR            | NR   | Non-progressive chronic encephalopathy            | No            | No        | Yes  | Recovered            |
|              | #11             | 4.0     | F   | NR            | NR   | No                                                | No            | Yes       | Yes  | Recovered            |

Abbreviations: PICU, pediatric intensive care unit; F, female; M, male; R, reactive; NR, no reactive. <sup>a</sup>Outcome refers to the disease course. <sup>b</sup>Paired samples.

**Figure S1.**

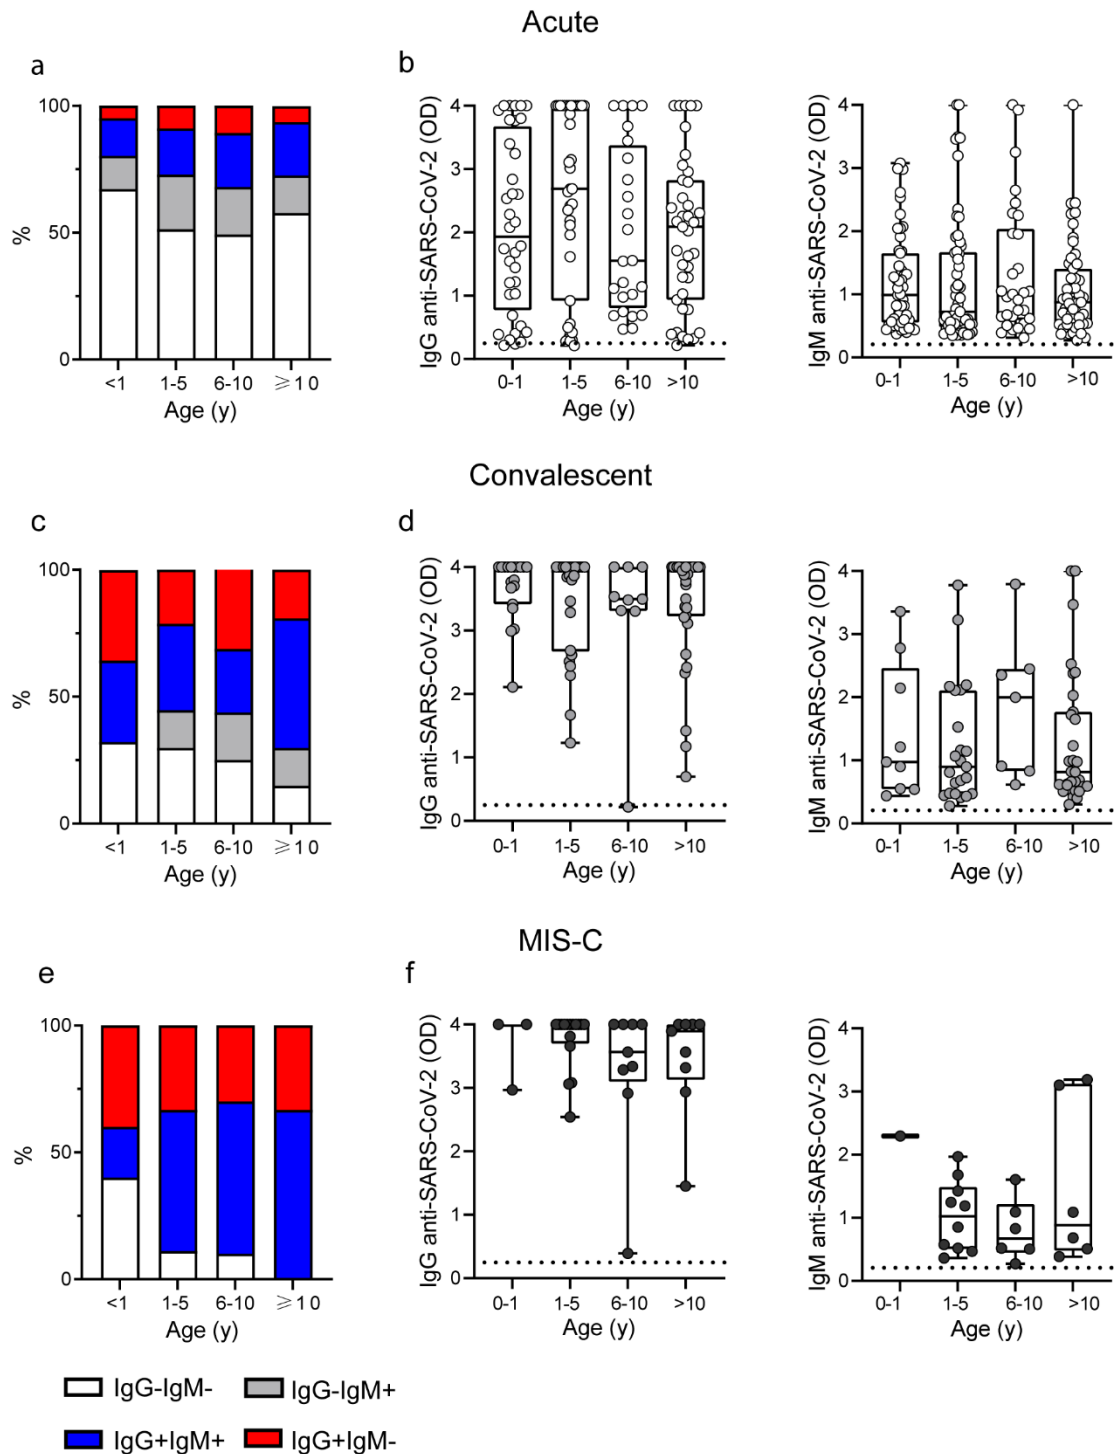

**Figure S1. Antibody response against SARS-CoV-2 in children with COVID-19 and MIS-C stratified according to age. (a)** Frequency of children in the acute phase of infection that produced IgG and/or IgM antibodies to the Spike/RBD protein of SARS-CoV-2: <1 year, n=186; 1 to 5 years, n=146; 6 to 10 years, n=76; and >10 years, n=142. **(b)** Plasma levels of IgG and IgM antibodies directed to the Spike/RBD protein in SARS-CoV-2-seropositive

children under the acute phase of the infection are shown: <1 year, n=37 and n=52; 1 to 5 years, n=39 and n=57; 6 to 10 years, n=24 and n=30; and >10 years, n=39 and n=52, for IgG and IgM respectively. **(c)** Frequency of children in the convalescent phase of the infection that produced IgG and/or IgM antibodies to the Spike/RBD protein of SARS-CoV-2: <1 year, n=28; 1 to 5 years, n=47; 6 to 10 years, n=16; and >10 years, n=47. **(d)** Plasma levels of IgG and IgM antibodies directed to the Spike/RBD protein in SARS-CoV-2-seropositive children under the convalescent phase of the infection are shown: <1 year, n=19 and n=9; 1 to 5 years, n=26 and n=23; 6 to 10 years, n=9 and n=7; and >10 years, n=33 and n=31, for IgG and IgM respectively. **(e)** Frequency of MIS-C that produced IgG and/or IgM antibodies to the Spike/RBD protein of SARS-CoV-2: <1 year, n=5; 1 to 5 years, n=18; 6 to 10 years, n=10; and >10 years, n=9. **(f)** Plasma levels of IgG and IgM antibodies directed to the Spike/RBD protein were measured in MIS-C: <1 year, n=3 and n=1; 1 to 5 years, n=16 and n=10; 6 to 10 years, n=9 and n=6; and >10 years, n=9 and n=6, for IgG and IgM respectively. Dotted line indicates the cut-off value in b, d, f. Median and min to max of n donors are shown in b, d, f. P values were determined by Pearson's Chi square test and Kruskal-Wallis test. Acute (white circle), Convalescent (grey circle), MIS-C (black circle).

**Figure S2.**

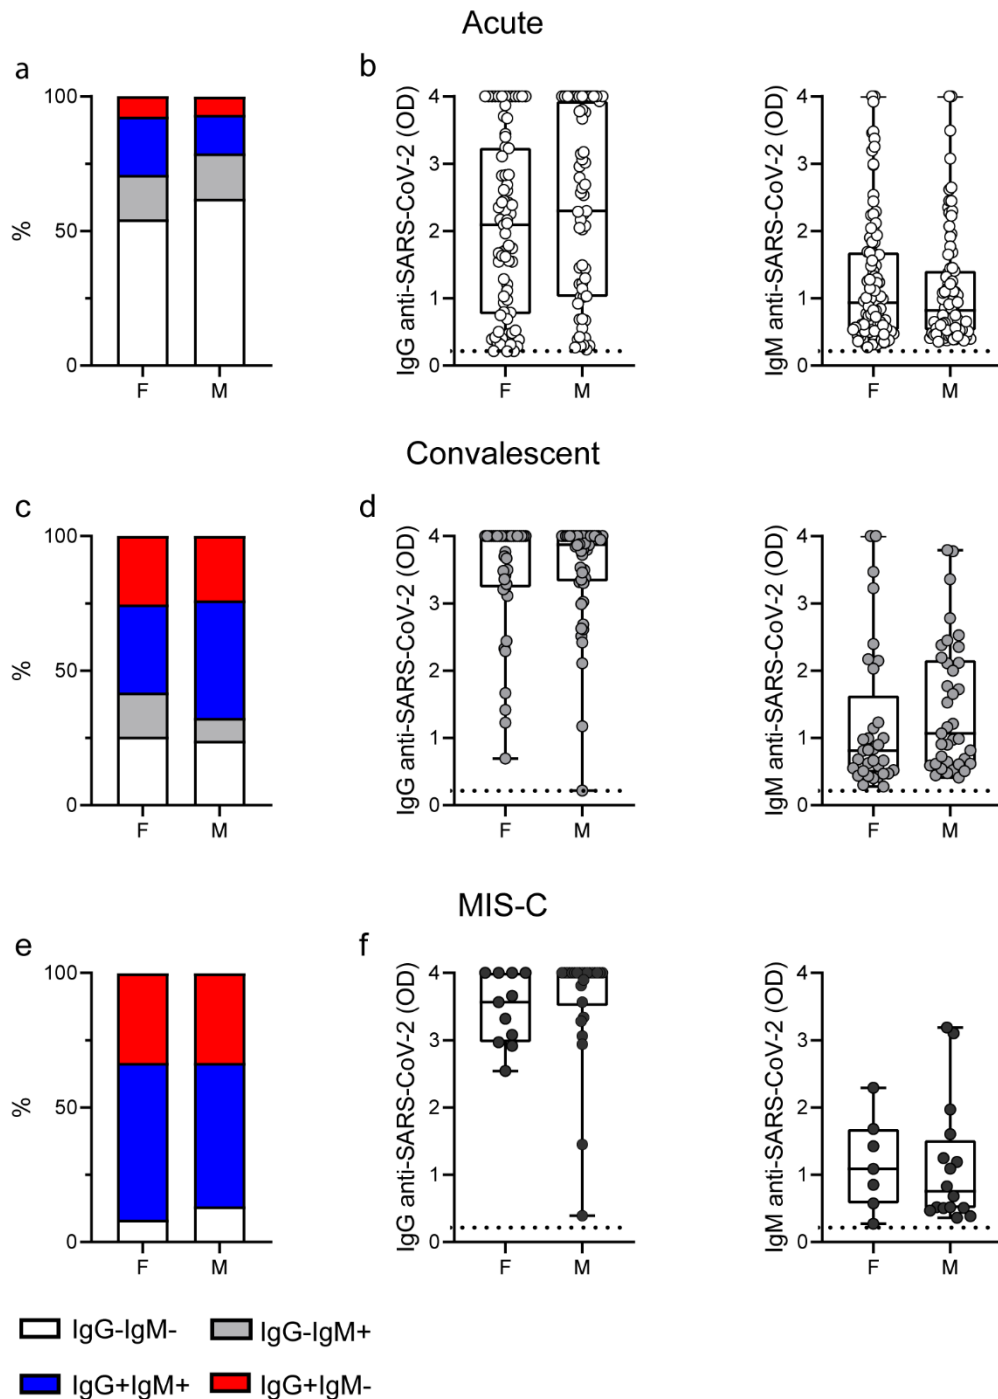

**Figure S2. Antibody response against SARS-CoV-2 in children with COVID-19 and MIS-C according to sex. (a)** Frequency of girls (n=267) and boys (n=283) in the acute phase of infection that produced IgG and/or IgM antibodies to the Spike/RBD protein of SARS-CoV-2. **(b)** Plasma levels of IgG and IgM antibodies directed to the Spike/RBD protein in SARS-CoV-2-seropositive children under the acute phase of the infection are shown: girls, n=79 and n=103; boys, n=60 and n=88, for IgG and IgM, respectively. **(c)** Frequency of girls (n= 67) and boys (n=71) during the convalescent phase of the infection that produced IgG



and/or IgM antibodies to the Spike/RBD protein of SARS-CoV-2. **(d)** Plasma levels of IgG and IgM antibodies directed to the Spike/RBD protein in SARS-CoV-2-seropositive children under the convalescent phase of the infection are shown: girls, n=39 and n=33; boys, n=48 and n=37, for IgG and IgM, respectively. **(e)** Frequency of girls (n=12) and boys (n=30) with MIS-C that produced IgG and/or IgM antibodies to the Spike/RBD protein of SARS-CoV-2. **(f)** Plasma levels of IgG and IgM antibodies directed to the Spike/RBD protein were measured in MIS-C: girls, n=11 and n=7; boys, n=26 and n=16, for IgG and IgM, respectively. Dotted line indicates the cut-off value in b, d, f. Median and min to max of n donors are shown in b, d, f. P values were determined by Pearson's Chi square test and Mann-Whitney U test. Acute (white circle), Convalescent (grey circle), MIS-C (black circle).

**Figure S3.**

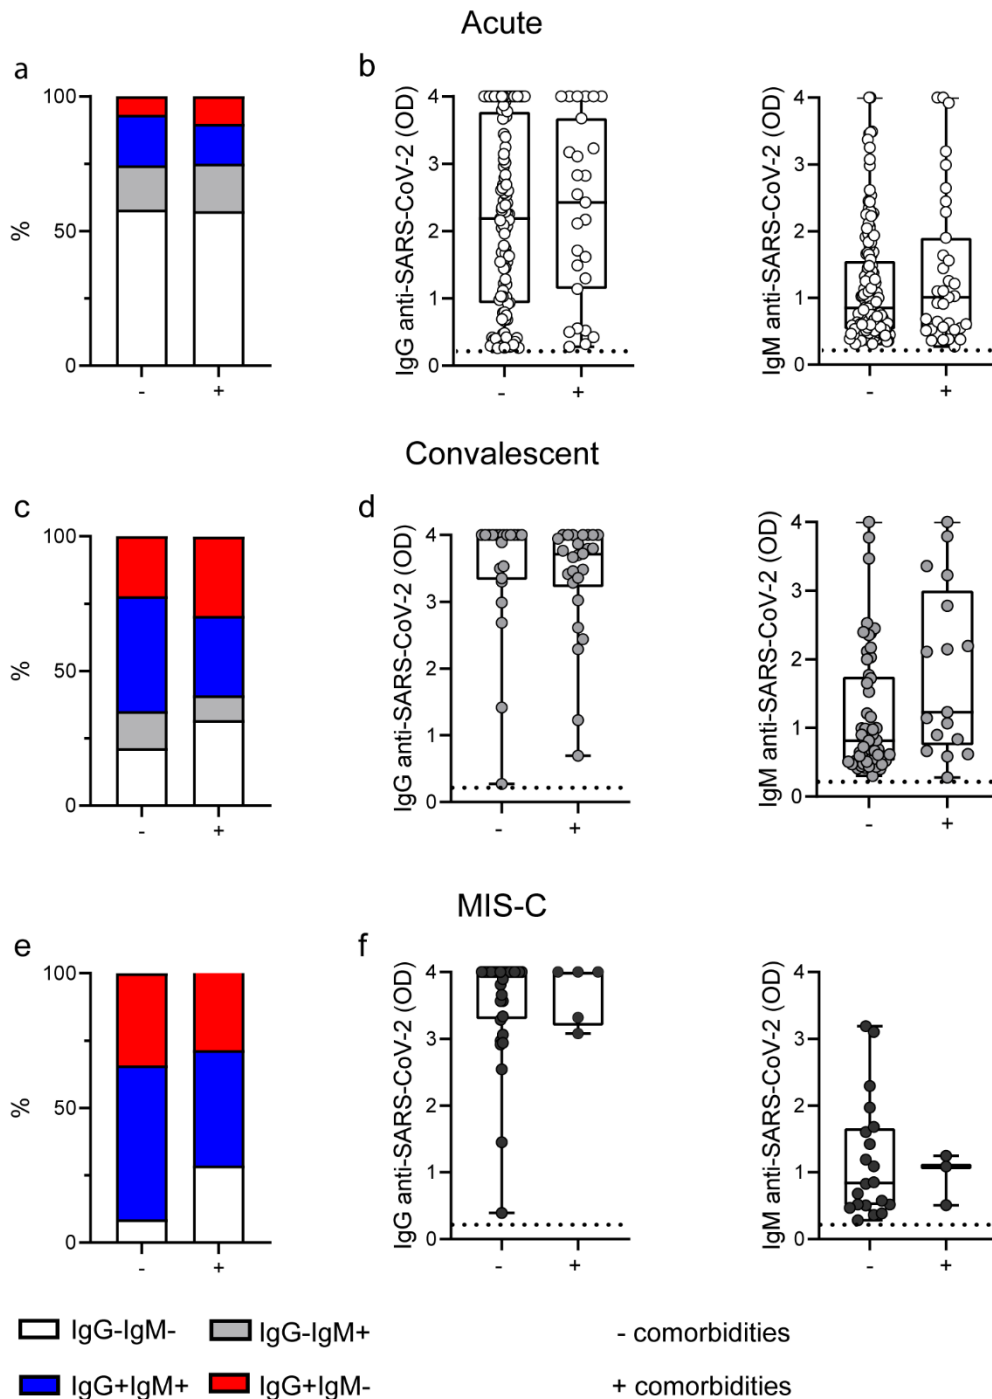

**Figure S3. Antibody response against SARS-CoV-2 in children with COVID-19 and MIS-C according to the presence of comorbidities. (a)** Frequency of children having comorbidities (n=108) and or not (n=442) in the acute phase of infection that produced IgG and/or IgM antibodies to the Spike/RBD protein of SARS-CoV-2. **(b)** Plasma levels of IgG and IgM antibodies directed to the Spike/RBD protein in SARS-CoV-2-seropositive children under the acute phase of the infection are shown: with comorbidities, n=27 and n=35; without comorbidities, n=112 and n=156, for IgG and IgM, respectively. **(c)** Frequency of children

having comorbidities (n=44) and or not (n=94) during the convalescent phase of the infection that produced IgG and/or IgM antibodies to the Spike/RBD protein of SARS-CoV-2. **(d)** Plasma levels of IgG and IgM antibodies directed to the Spike/RBD protein in SARS-CoV-2-seropositive children under the convalescent phase of the infection are shown: with comorbidities, n=26 and n=17; without comorbidities, n=61 and n=53, for IgG and IgM, respectively. **(e)** Frequency of children having comorbidities (n=7) and or not (n=35) with MIS-C that produced IgG and/or IgM antibodies to the Spike/RBD protein of SARS-CoV-2. **(f)** Plasma levels of IgG and IgM antibodies directed to the Spike/RBD protein were measured in MIS-C: with comorbidities, n=5 and n=3; without comorbidities, n=32 and n=20, for IgG and IgM, respectively. Dotted line indicates the cut-off value in b, d, f. Median and min to max of n donors are shown in b, d, f. P values were determined by Pearson's Chi square test and Mann-Whitney U test. Acute (white circle), Convalescent (grey circle), MIS-C (black circle).

**Figure S4.**

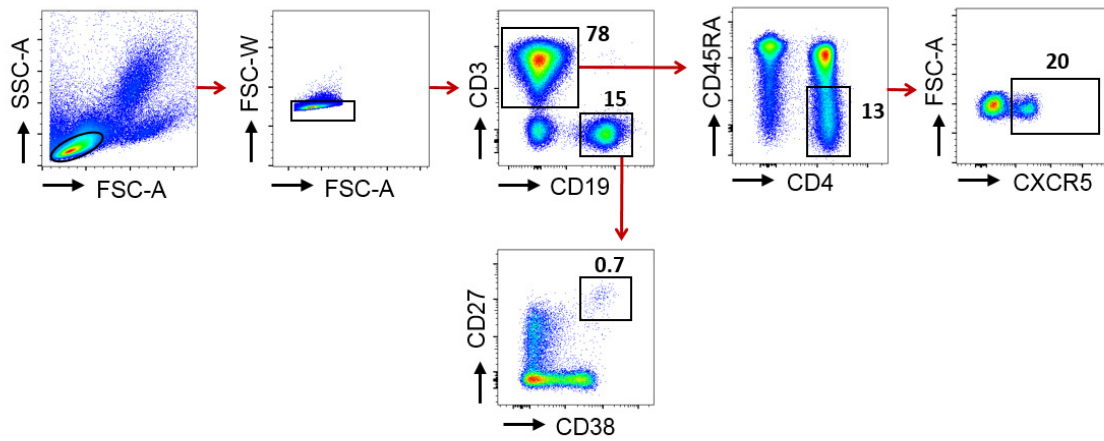

**Figure S4. Gating strategy.** Representative FACS profile showing the gating strategy for the analysis of cTfh cells and plasmablasts. Peripheral blood mononuclear cells ( $1 \times 10^6$ ) were stained with the antibody cocktail mix (anti-CD3, anti-CD4, anti-CD45RA, anti CXCR5, anti-CD19, anti-CD27 y anti-CD38) for 20 min at room temperature. After washing, data were acquired using a FACSCanto II (Becton Dickinson). cTfh were defined as CD3+CD4+CD45RA-CXCR5+ cells and plasmablasts were defined as CD19+CD27<sup>hi</sup>CD38<sup>hi</sup>. A representative experiment is shown.
